# Supplementary material for: Characterization of low adsorption filter membranes for electrophoresis and electrokinetic sample manipulations in microfluidic paper-based analytical devices
Source: Royal Society of Chemistry journal article supplement (doi:10.1039/c8ay01237g), 2018-01-01
Supplement: c8ay01237g1.pdf [file c8ay01237g1.pdf]

Electronic supplementary information to accompany a research article submitted to:  
*Analytical Methods*

**Characterization of low adsorption filter membranes for  
electrophoresis and electrokinetic sample manipulations in  
microfluidic paper-based analytical devices**

Laura D. Casto, Jennifer A. Schuster, Claire D. Neice, Christopher A. Baker\*

Department of Chemistry, University of Tennessee, Knoxville, 552 Buehler Hall, 1420  
Circle Dr., Knoxville, TN 37996

Keywords: Paper microfluidics,  $\mu$ PAD, microfabrication, separation, zonal electrophoresis

\*Address correspondence to:

Dr. Christopher A. Baker  
Department of Chemistry  
University of Tennessee, Knoxville  
552 Buehler Hal  
1420 Circle Dr.  
Knoxville, TN 37996  
Phone: (865)974-8225  
Email: [chris.baker@utk.edu](mailto:chris.baker@utk.edu)

**Figure S1**

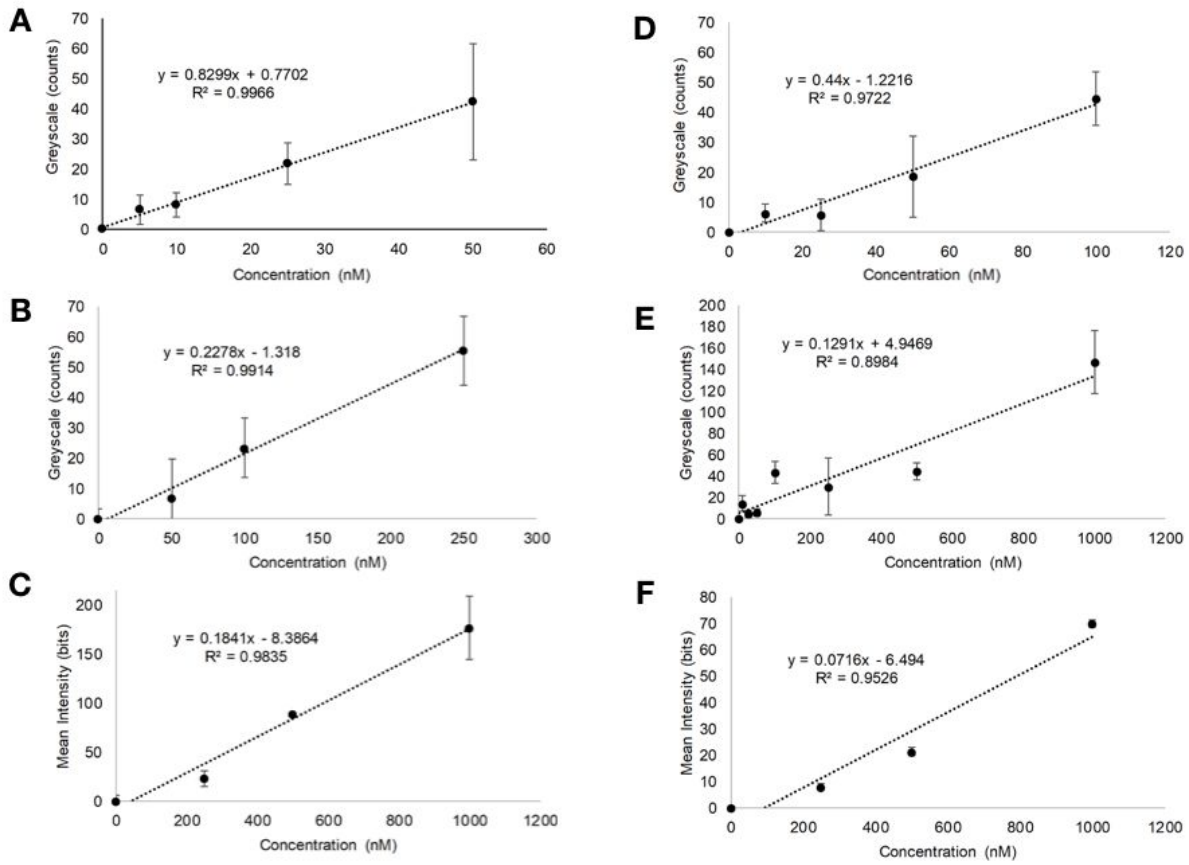

**Figure S1. Fluorescence calibration plots.**

Blank-subtracted fluorescence calibration plots utilized for detection limit calculations. **A.** Fluorescein on OE66 **B.** Fluorescein on PVDF **C.** Fluorescein on MF **D.** Nile blue on OE66 **E.** Nile blue on PVDF **F.** Nile blue on MF

**Figure S2**

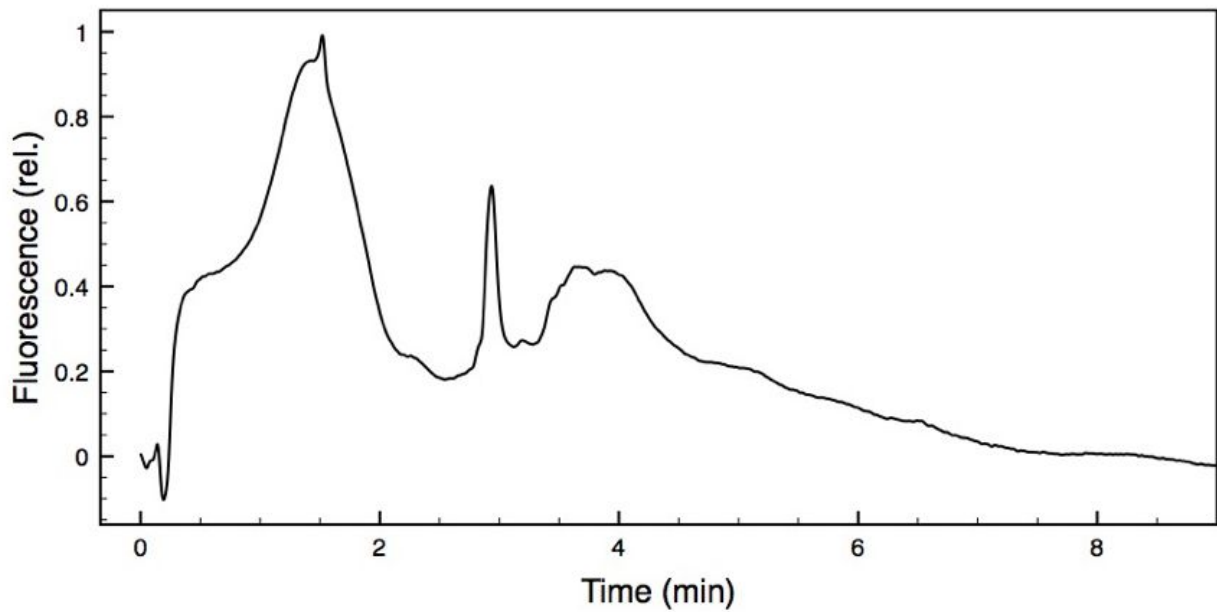

**Figure S2. Representative electropherograms in MF  $\mu$ PADs.**

Electropherograms in both TRIS and borate BGEs were irreproducible and complex, but the representative trace here demonstrates their common appearance: a complex peak profile migrating entirely before 4 minutes. We hypothesize this results from relatively high rates of electroosmotic flow which prevents electrophoretic resolution on these time scales. Further device optimization may improve separation performance and reproducibility.
